# Supplementary material
Source: PubMed Central journal article supplement (PMC4883107)

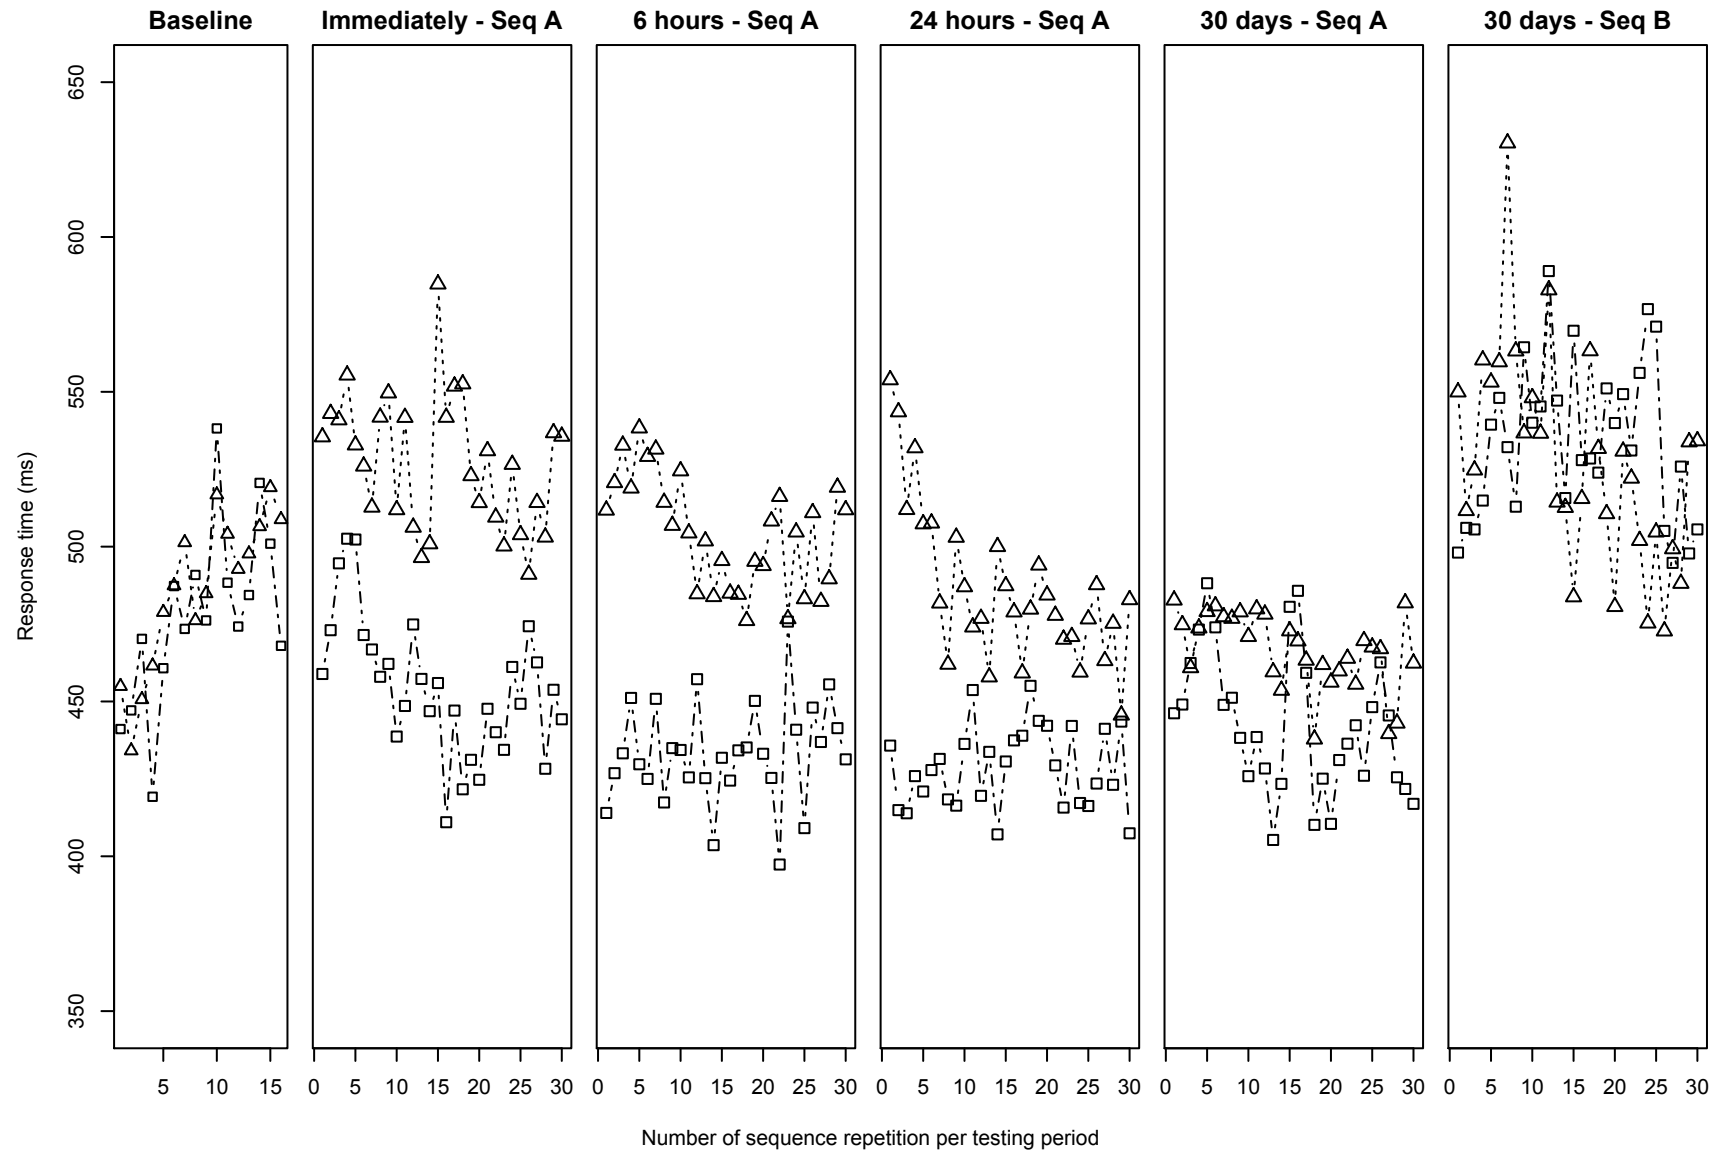

Supplement: NIHMS787270-supplement-fig.pdf [file NIHMS787270-supplement-fig.pdf]
